# Supplementary material
Source: publisher figshare collection journal article supplement (https://sage.figshare.com/ndownloader/files/14993810)
Supplement: Supplementary file 1 [file 14993810]

**Supplementary Table 1. IHS Diagnostic Criteria for Tolosa-Hunt Syndrome (ICHD)**

| <b>IHS Diagnostic Criteria for Tolosa-Hunt Syndrome<sup>8</sup></b>                                                                                                                                                                                |  |
|----------------------------------------------------------------------------------------------------------------------------------------------------------------------------------------------------------------------------------------------------|--|
| A. Unilateral headache fulfilling criterion C                                                                                                                                                                                                      |  |
| B. Both of the following:<br><br>1. Granulomatous inflammation in cavernous sinus, superior orbital fissure or orbit, demonstrated by MRI or biopsy<br><br>2. paresis of >1 of the ipsilateral CN III, IV, and/or VI.                              |  |
| C. Evidence of causation demonstrated by both of the following<br><br>1. Headache has preceded paresis of the CN III, IV, and/or VI nerves by <2 weeks, or developed with it.<br><br>2. Headache is localized around the ipsilateral brow and eye. |  |
| D. Symptoms not better accounted for by another ICHD-3 diagnosis                                                                                                                                                                                   |  |

CN=cranial nerve; ICHD= The International Classification of Headache Disorders;

MRI=magnetic resonance imaging
